# Supplementary material
Source: PubMed Central journal article supplement (PMC3292351)
Supplement: NIHMS352254-supplement-1_si_001.pdf [file NIHMS352254-supplement-1_si_001.pdf]

## SUPPORTING INFORMATION

### **Porphyrins-Functionalized Single-Walled Carbon Nanotubes Chemiresistive Sensor Arrays for VOCs**

Mahendra D. Shirsat<sup>†,#</sup>, Tapan Sarkar<sup>†,#</sup>, James Kakoullis Jr<sup>§</sup>, Nosang V. Myung<sup>†</sup>, Bharatan Konnanath<sup>‡</sup>, Andreas Spanias<sup>‡</sup> and Ashok Mulchandani<sup>†,\*</sup>

<sup>†</sup>Department of Chemical and Environmental Engineering, University of California, Riverside, CA, USA.

<sup>§</sup>Department of Chemistry, University of California, Riverside, CA, USA.

<sup>‡</sup>School of Electrical, Computer and Energy Engineering, Arizona State University, Tempe, Arizona, USA

**Figure S1:** FET measurement of bare SWNT and SWNTs-RuOEP device: a)  $I_{DS}-V_{DS}$  curve ( at  $V_{GS} = 0$  V), b)  $I_{DS}-V_{GS}$  curve ( at  $V_{DS} = -1$  V), c) carrier concentration vs. resistance curve and d) carrier mobility vs. resistance curve

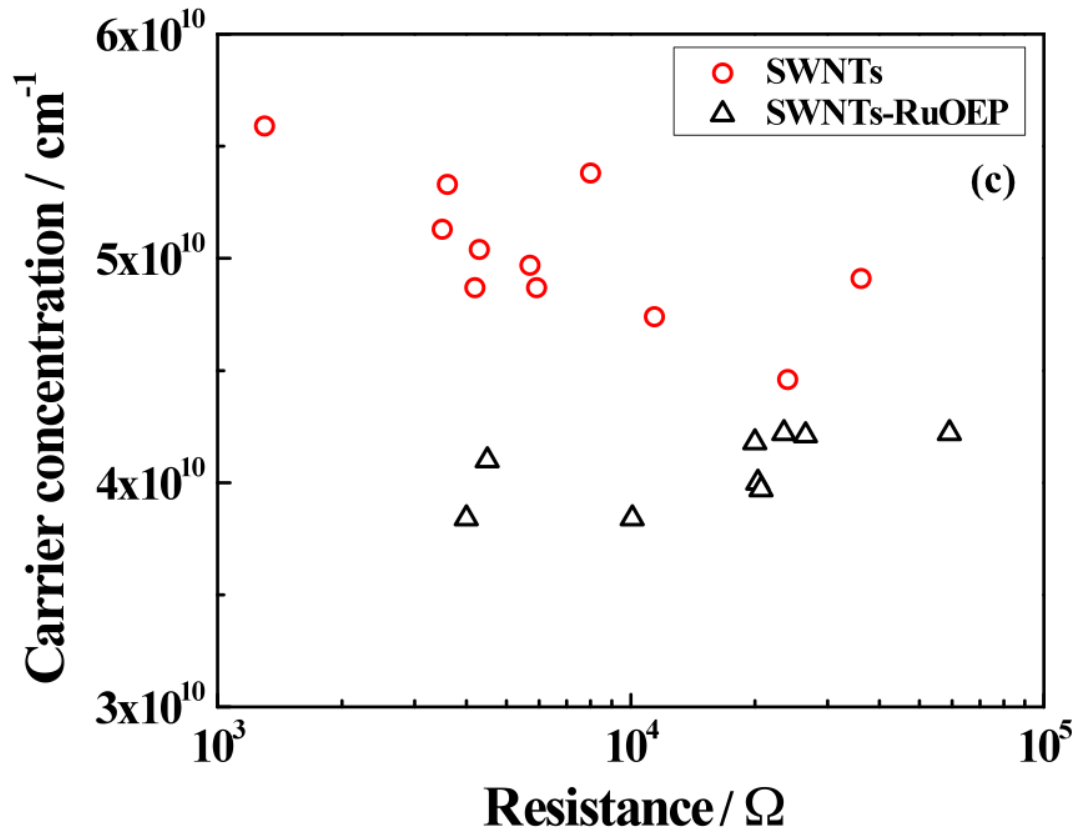

Figure S1(a)

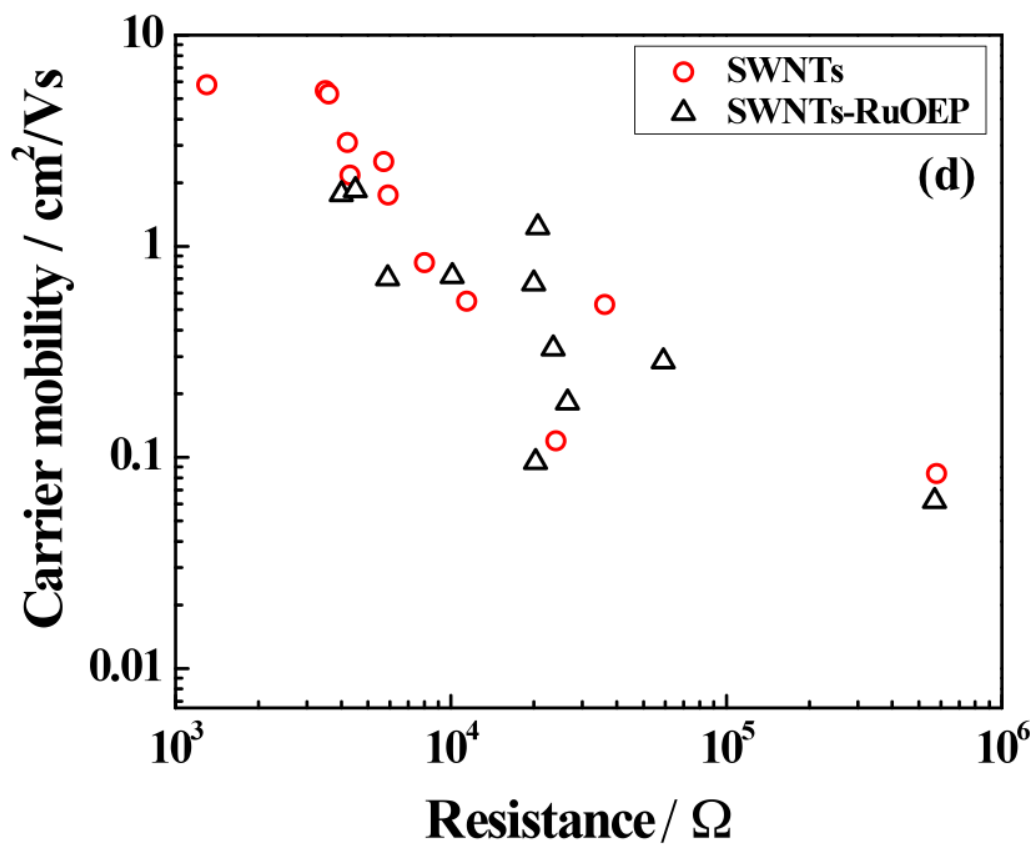

Figure S1(b)
